# Supplementary material
Source: Springer Nature journal article supplement (https://www.springermedizin.de/resource/supplementary/12974_2010_322_MOESM6_ESM.pdf/9601272)

**A***GFAP*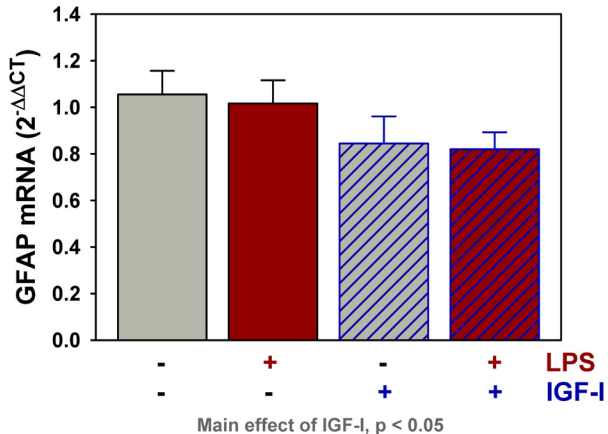**B***COX2*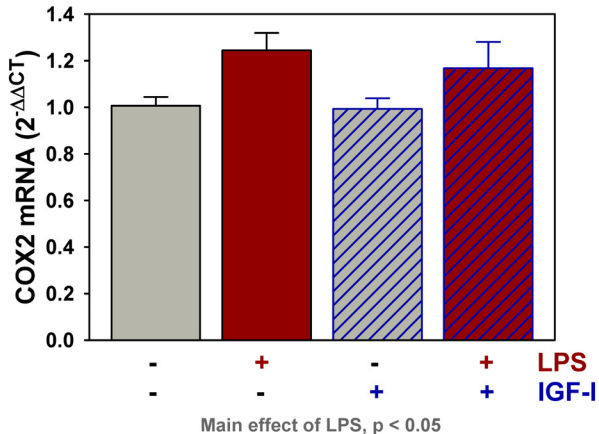

Supplement: MOESM6 [file 9601272]
